# Supplementary material
Source: publisher figshare collection journal article supplement (https://frontiersin.figshare.com/ndownloader/files/22816112)

**Supplementary Appendix.**

Modular plots of 11 species networks, 11 female subnetworks and 11 male subnetworks. In each bipartite matrix, visitor species are arranged on columns and plant species on rows.

Ashu 1984, Species network


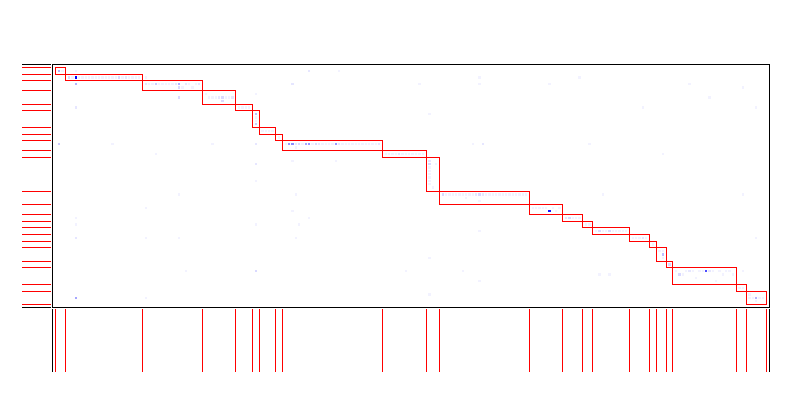


Ashu 1984, Female subnetwork


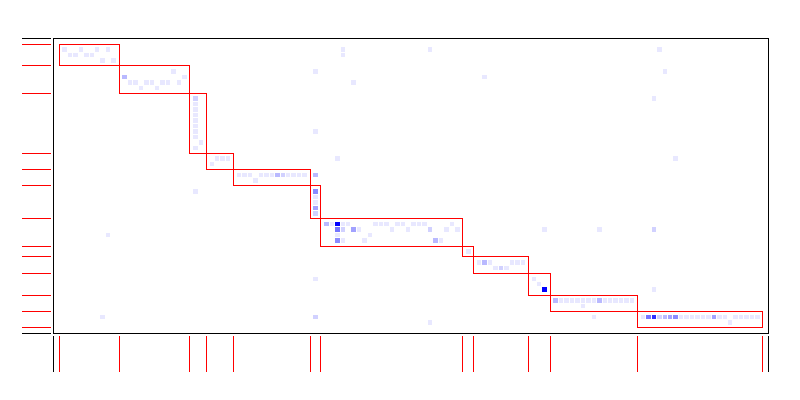


Ashu 1984, Male subnetwork


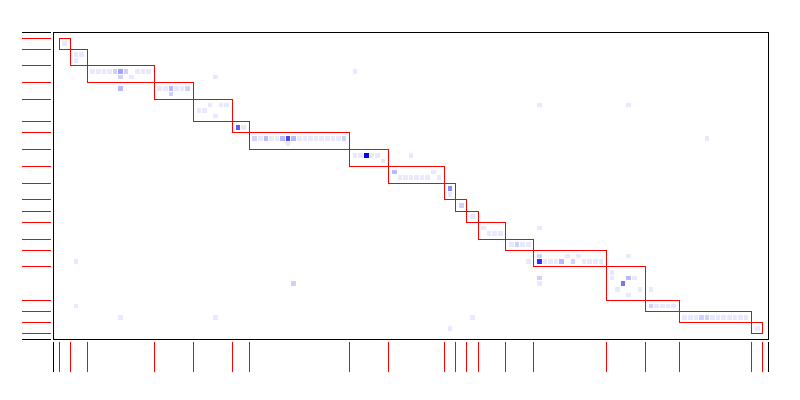


Ashu 1985, Species network


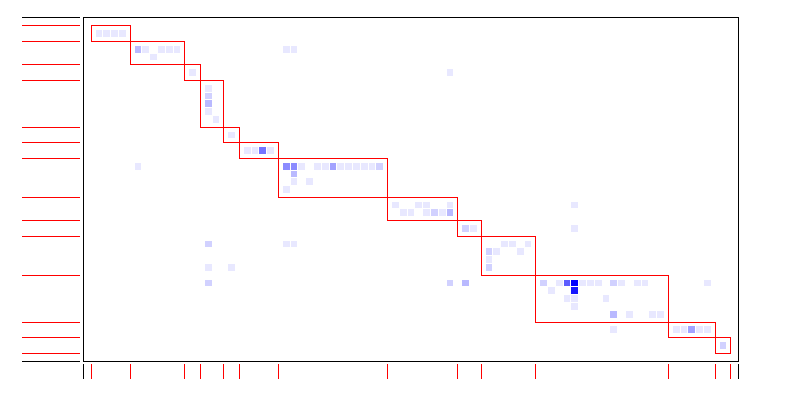


Ashu 1985, Female subnetwork


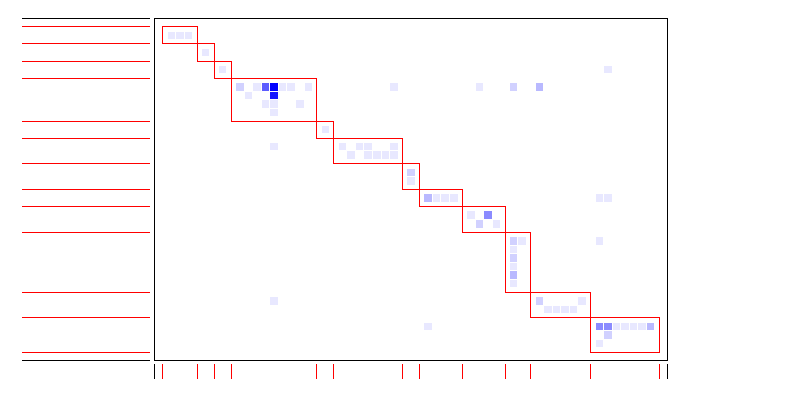


Ashu 1985, Male subnetwork


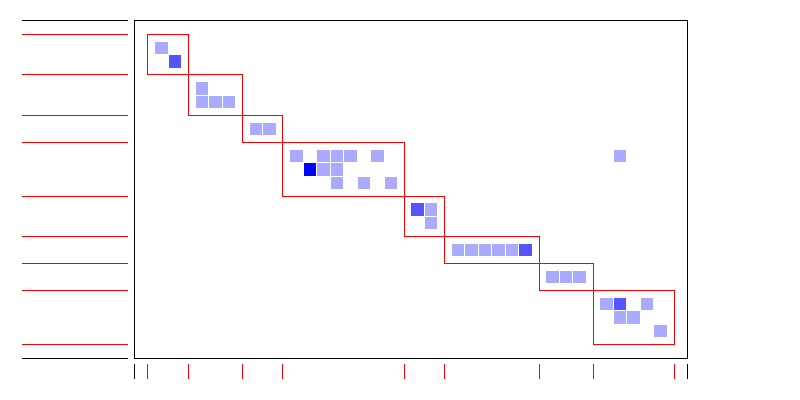


Ashu 1986, Species network


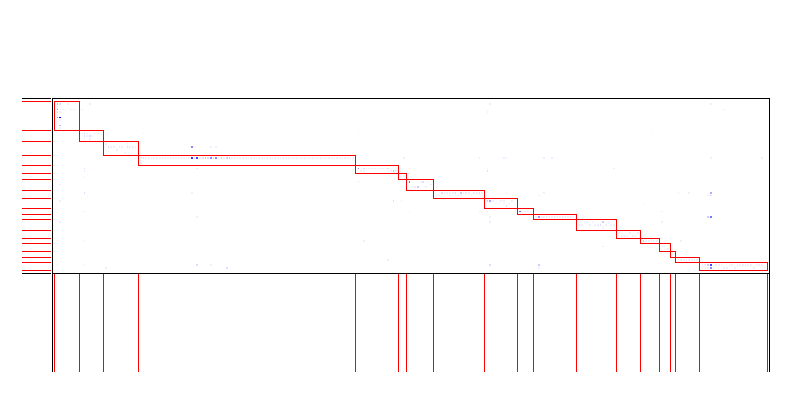


Ashu 1986, Female subnetwork


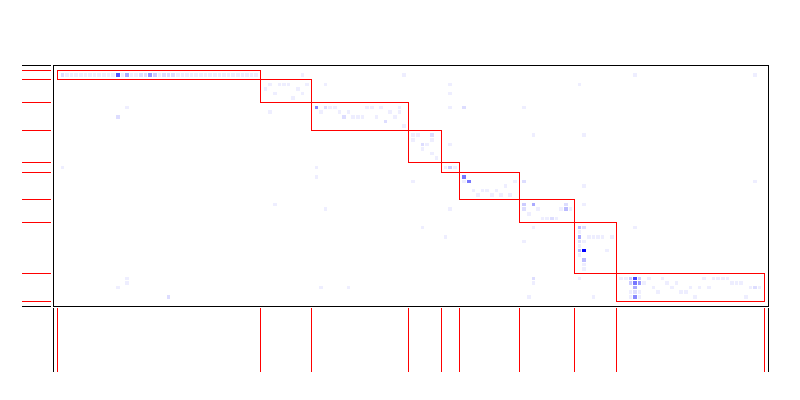


Ashu 1986, Male subnetwork


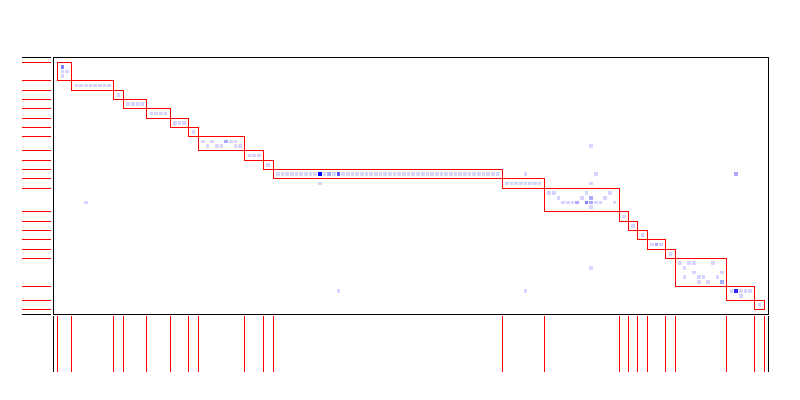


Ashu 1987, Species network


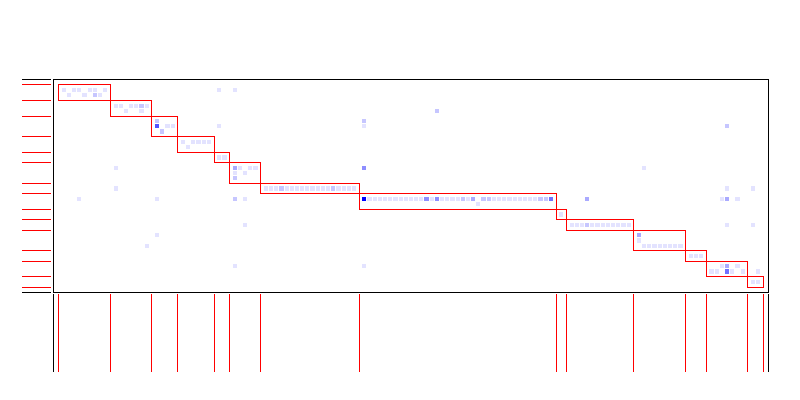


Ashu 1987, Female subnetwork


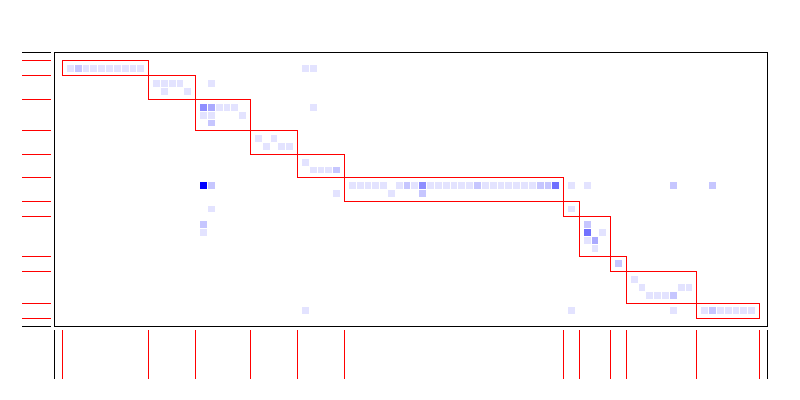


Ashu 1987, Male subnetwork


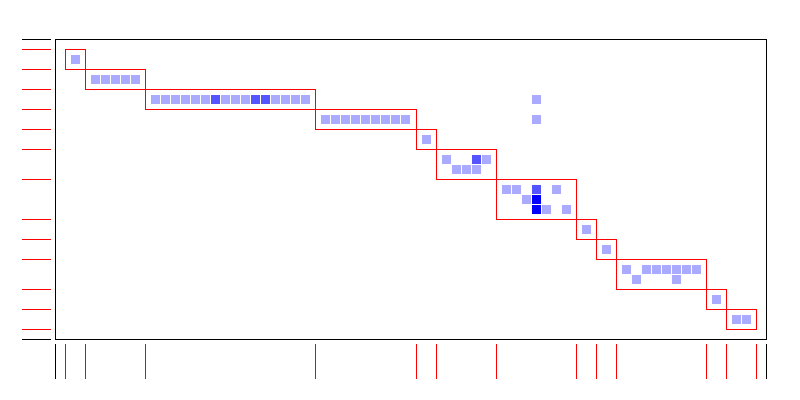


Kibune 1984, Species network


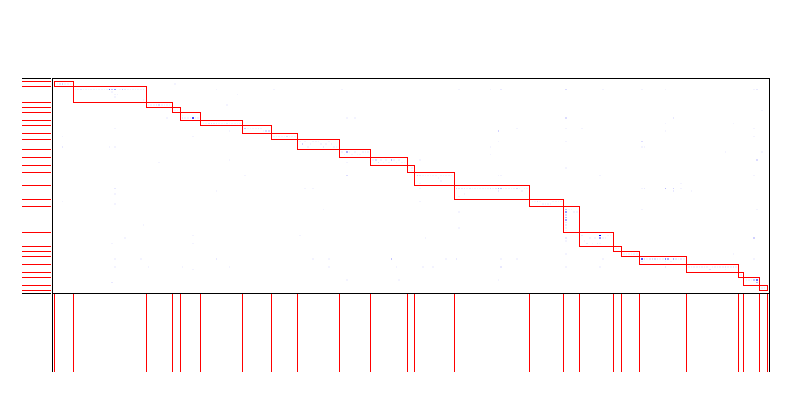


Kibune 1984, Female subnetwork


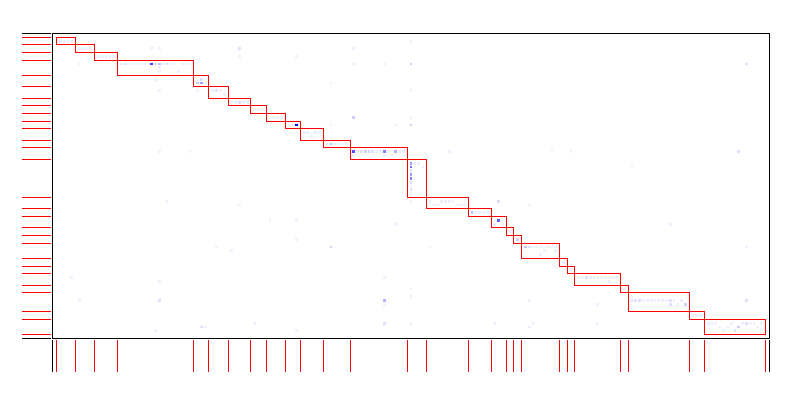


Kibune 1984, Male subnetwork


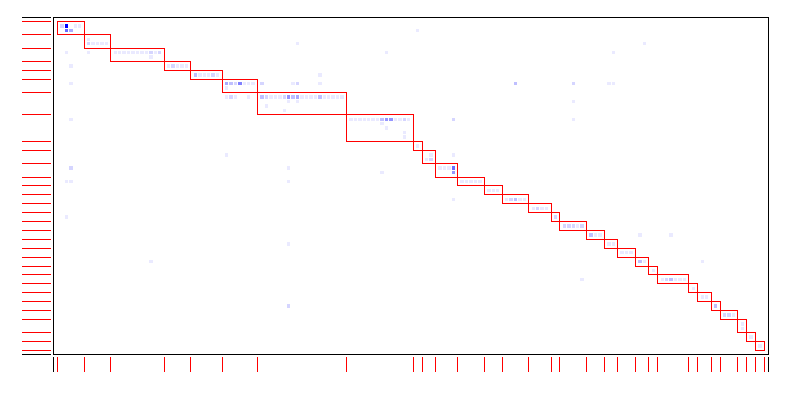


Kibune 1985, Species network


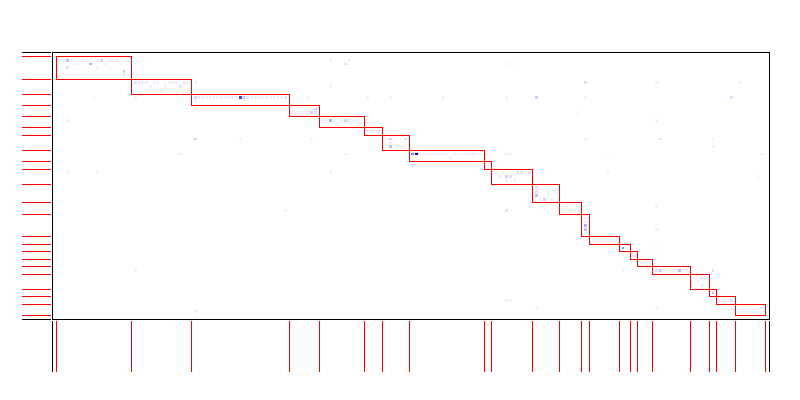


Kibune 1985, Female subnetwork


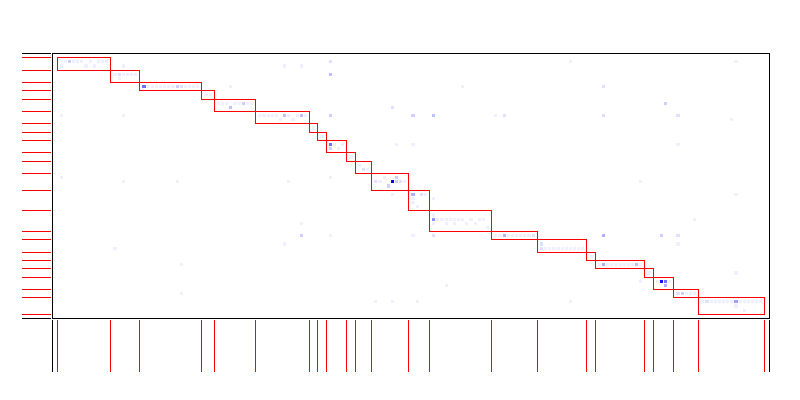


Kibune 1985, Male subnetworks


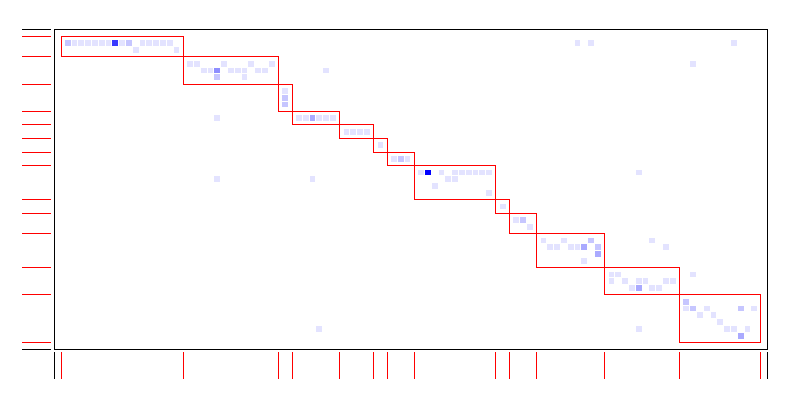


KIbune 1986, Species network


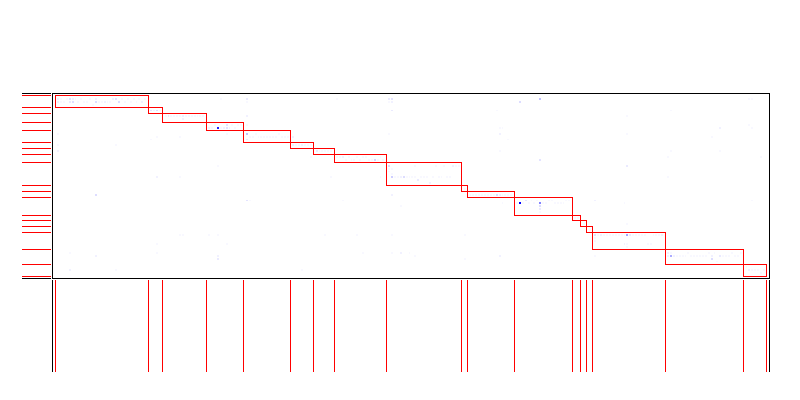


Kibune 1986, Female network


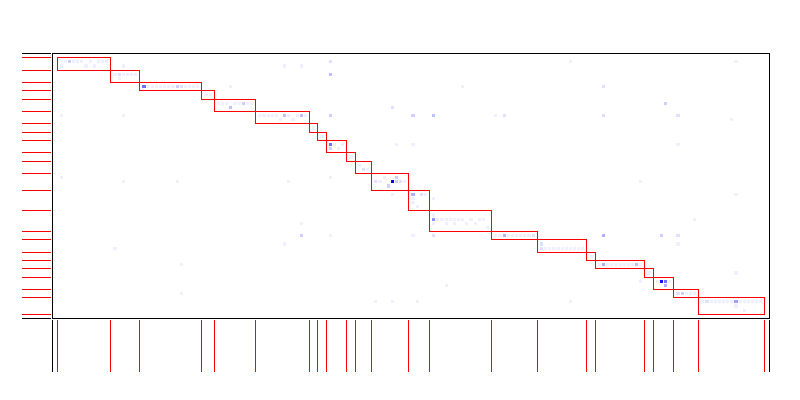


Kibune 1986, Male subnetwork


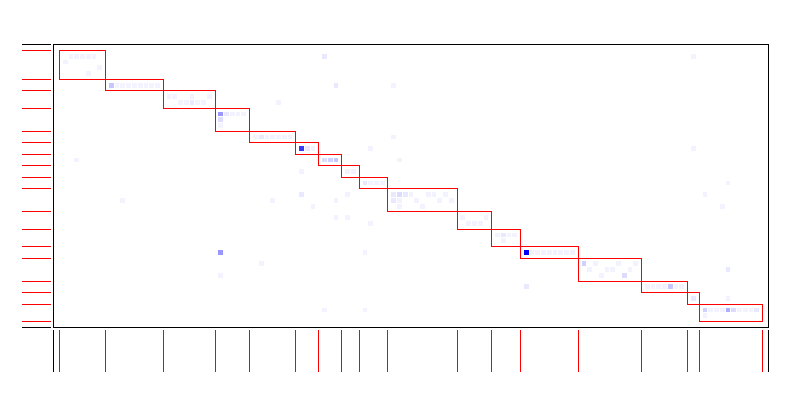


Kibune 1987, Species network


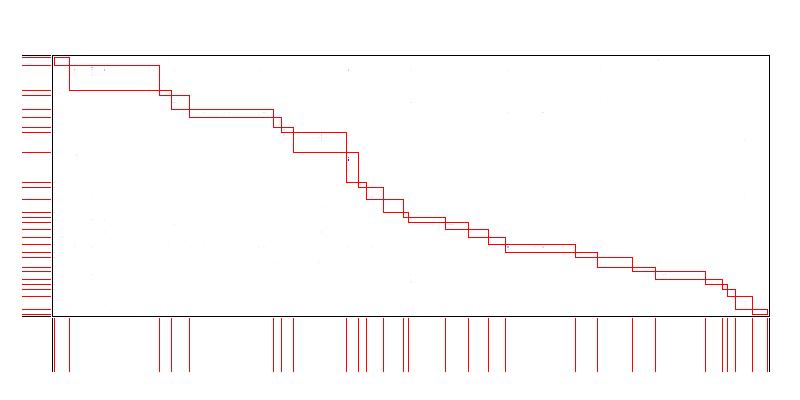


Kibune 1987, Female subnetwork


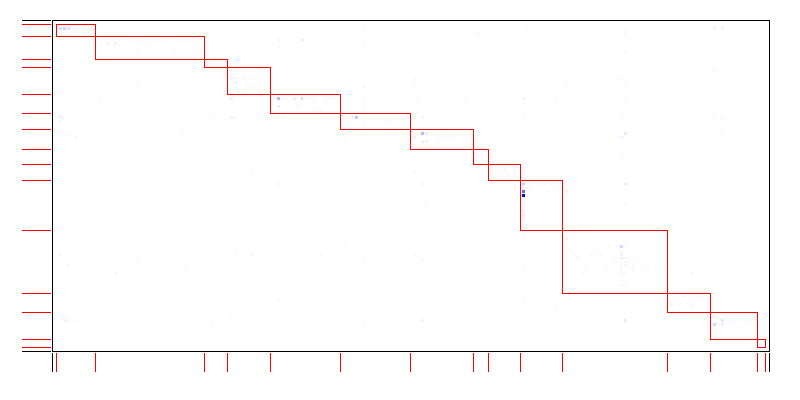


Kibune 1987, Male subnetwork


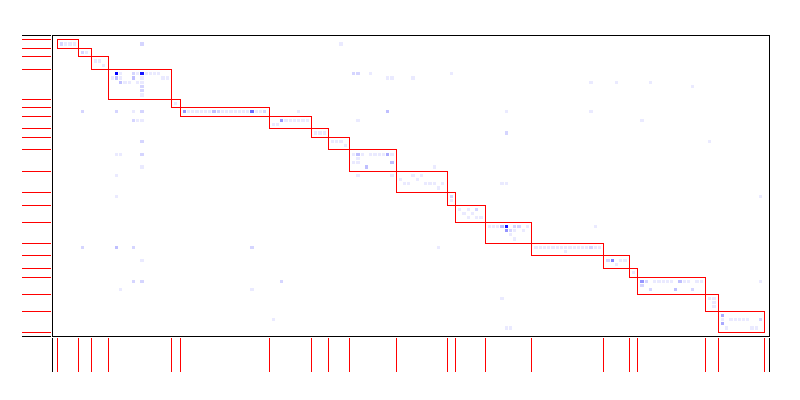


Kyoto Univ. 1985, Species network


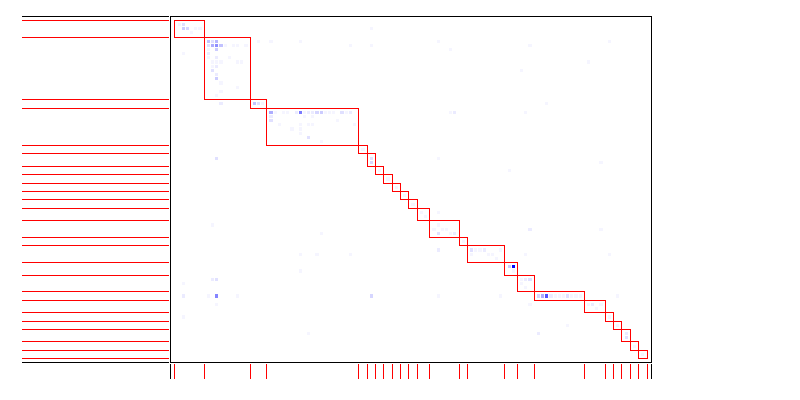


Kyoto Univ. 1985, Female subnetwork


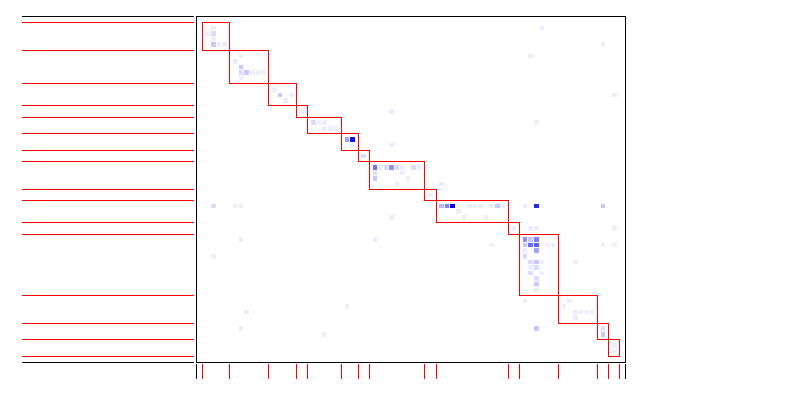


Kyoto Univ. 1985, Male subnetwork


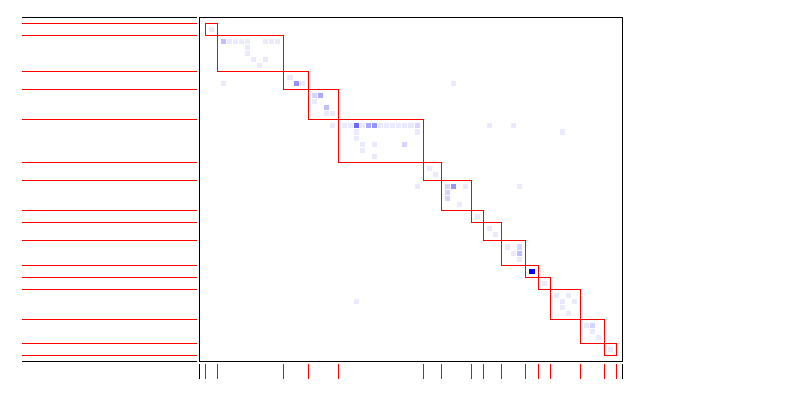


Kyoto Univ. 1986, Species network


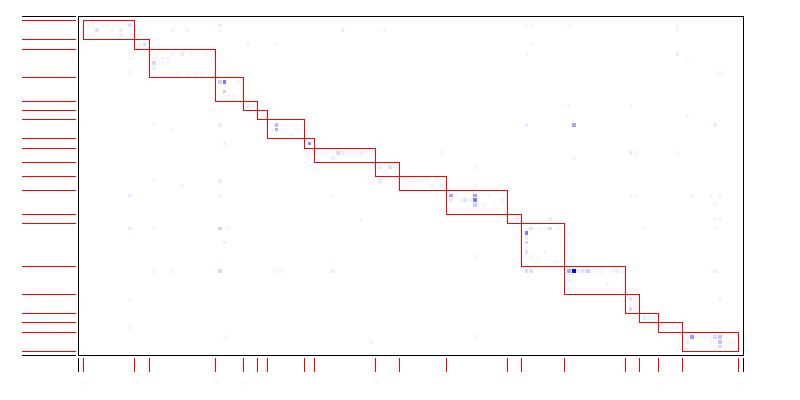


Kyoto Univ. 1986, Female subnetwork


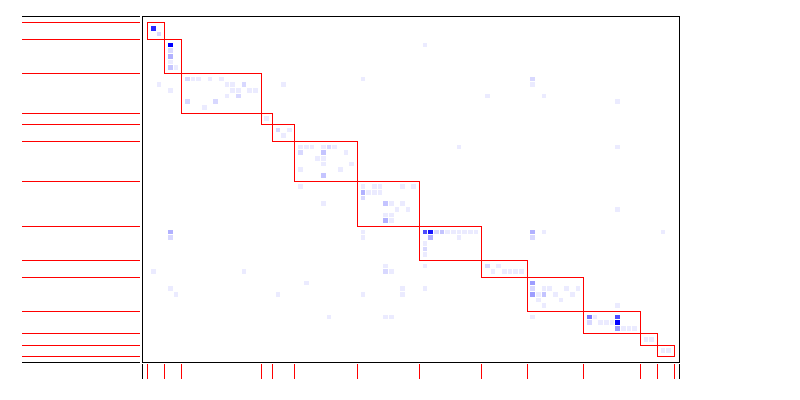


Kyoto Univ. 1986, Male subnetwork


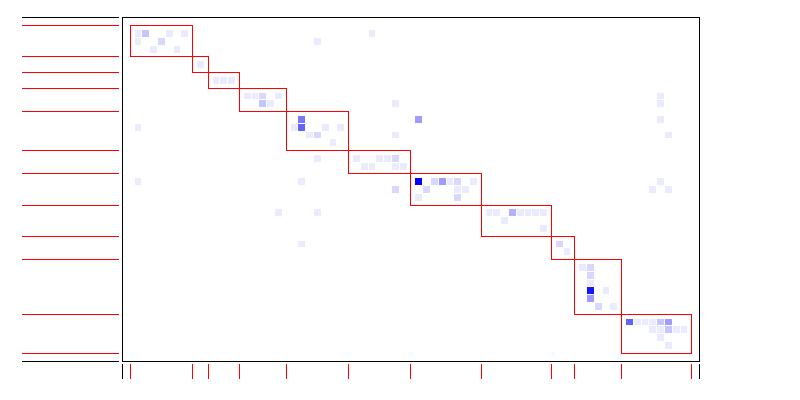


Kyoto Univ. 1987, Species network


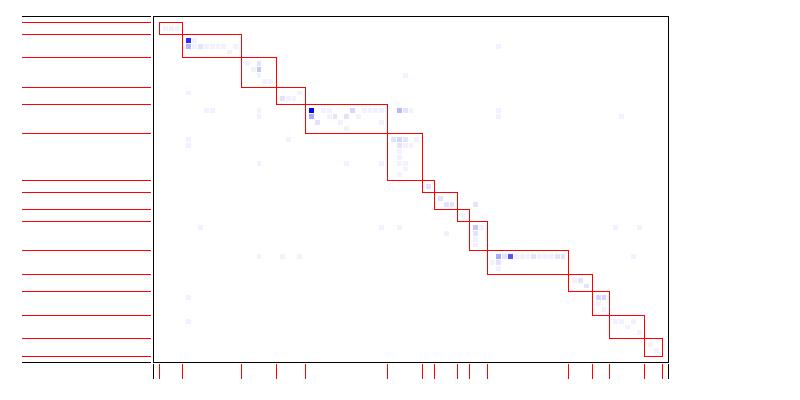


Kyoto Univ. 1987, Female network


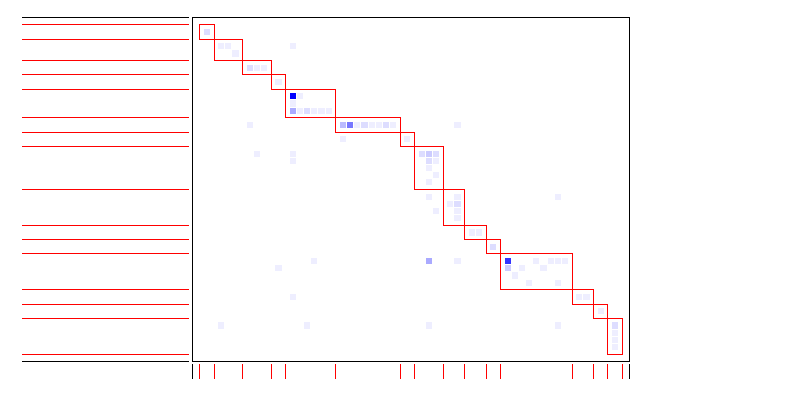


Kyoto Univ. 1987, Male subnetwork


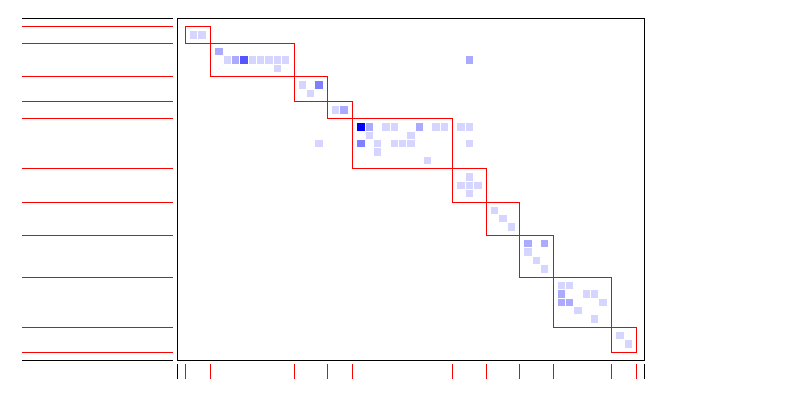

Supplement: Supplementary file 1 [file 22816112]
